# Supplementary material for: Self-doping synthesis of trivalent Ni2O3 as a hole transport layer for high fill factor and efficient inverted perovskite solar cells
Source: Royal Society of Chemistry journal article supplement (doi:10.1039/d0dt03029e), 2020-01-01
Supplement: d0dt03029e1.pdf [file d0dt03029e1.pdf]

## Supplementary Information

# Self-Doping Synthesis of Trivalent Ni<sub>2</sub>O<sub>3</sub> as Hole Transport Layer for High Fill Factor and Efficient Inverted Perovskite Solar Cells

Ahmed Mourtada Elseman,<sup>a,b##</sup> Lie Luo,<sup>a#</sup> Qun Liang Song,<sup>a\*</sup>

<sup>a</sup> Institute for Clean Energy and Advanced Materials, School of Materials and Energy, Southwest University, Chongqing Key Laboratory for Advanced Materials and Technologies of Clean Energy, Chongqing 400715, P. R. China. Email: qlsong@swu.edu.cn

<sup>b</sup> Electronic & Magnetic Materials Department, Advanced Materials Division, Central Metallurgical Research and Development Institute (CMRDI), Helwan, P.O. Box 87, Cairo 11421, Egypt. Email: AhmedMourtada5555@yahoo.com

<sup>#</sup> A. M. Elseman and Lie Luo contributed equally to this work.

### **Thermokinetic Parameters:**

Nonisothermal methods determined the kinetic and thermodynamic parameters. The non-isothermal kinetic analysis for the thermal decomposition of Ni-Ac, Ni-Nt and Ni-Mix in this work was carried out by the application of Coats-Redfern method.<sup>1</sup> The kinetic parameters were evaluated only for clear-cut and non-overlapping stages. Kinetic studies were not attempted for decomposition stages, which occur within a very narrow temperature range, resulting in a TG curve too steep for enough data to be collected. Furthermore, some decomposition steps are so small that within the accuracy of the measurements, a sufficient number of points from the TG curve could not be obtained to derive meaningful results for kinetic parameters. The kinetic parameters were calculated according to Coats-Redfern method methods.

### **Determination of reaction order of decomposition**

The Horowitz and Metzger equation  $C_s = n^{1/1-n}$ , where n is the order of the reaction and  $C_s$  is the mass fraction of the substance present at the DTA peak temperature;  $C_s$ , is given by:

$$C_s = (W_s - W_f)(W_0 - W_f) \quad (1)$$

Where  $W_s$  stands for the mass remaining at a given temperature,  $C_s$  is the DTG peak temperature,  $W_0$  and  $W_f$  are the initial and final masses of the substance, respectively.

### **Integral method used in this study:**

The Coats-Redfern equation:-

$$\log \left[ \frac{W_f / W_r}{T^2} \right] = \log \left[ \frac{AR}{\theta E^*} \left( 1 - \frac{2RT}{E^*} \right) \right] - \left( \frac{E^*}{2.303RT} \right) \quad (2)$$

Where  $W_f$  is the mass loss at completion of the reaction,  $W$  is the mass loss up to temperature  $T$ ; ( $W_r = W_f - W$ ),  $R$  is the gas constant,  $E^*$  is the activation energy in ( $\text{KJ mol}^{-1}$ ),  $\theta$  is the heating

rate. Since  $1 - 2RT/E^* \cong 1$ , a plot of the left-hand side of the above equation against  $1/T$  was constructed and  $E^*$  was calculated from the slope and A (Arrhenius constant) were calculated from the slope and the intercept, respectively.

**Degree of decomposition:**

$$\alpha = \frac{W_0 - W_T}{W_0 - W_f} \quad (4)$$

Where  $\alpha$  is extent decomposition,  $W_T$ ,  $W_0$ ,  $W_f$  are the actual, initial, and final mass of the sample, respectively. The activation energy (E) can be calculated from a plot of  $\log(g(\alpha)/T^2)$  vs.  $1/T$ . The excellent correlation coefficients, which indicate a good fit of the linear function, were obtained for the Coats-Redfern method as shown in Figure S2. This figure gives the slope for calculation of E which used to calculate  $\Delta H^*$ ,  $\Delta S^*$  and  $\Delta G^*$  using the following equations:

The following equations calculate the enthalpy, entropy and free energy:

**Activation enthalpy:**

$$\Delta H^* = E^* - RT \quad (5)$$

**The entropy of activation:**

$$\Delta S^* = R \left[ \ln \left( \frac{Ah}{KT} \right) - 1 \right] \quad (6)$$

**Free energy:**

$$\Delta G^* = \Delta H^* - T\Delta S^* \quad (7)$$

where K is the Boltzmann's constant and h is the Planck's constant.

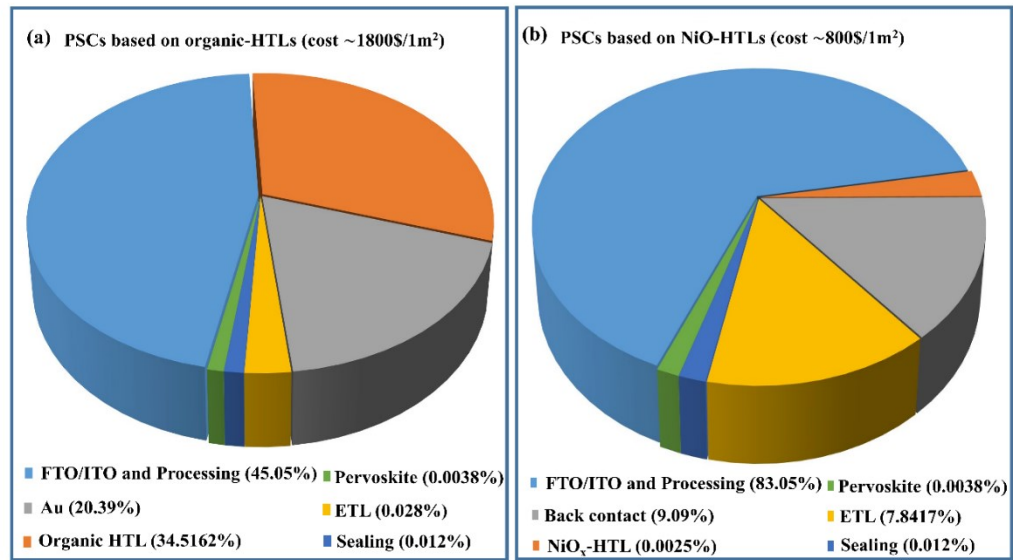

**Figure S1.** Pie charts illustrate the cost-breakdown for PSCs incorporated with (a) Organic-HTMs (b) NiO<sub>x</sub>-HTMs.<sup>2</sup>

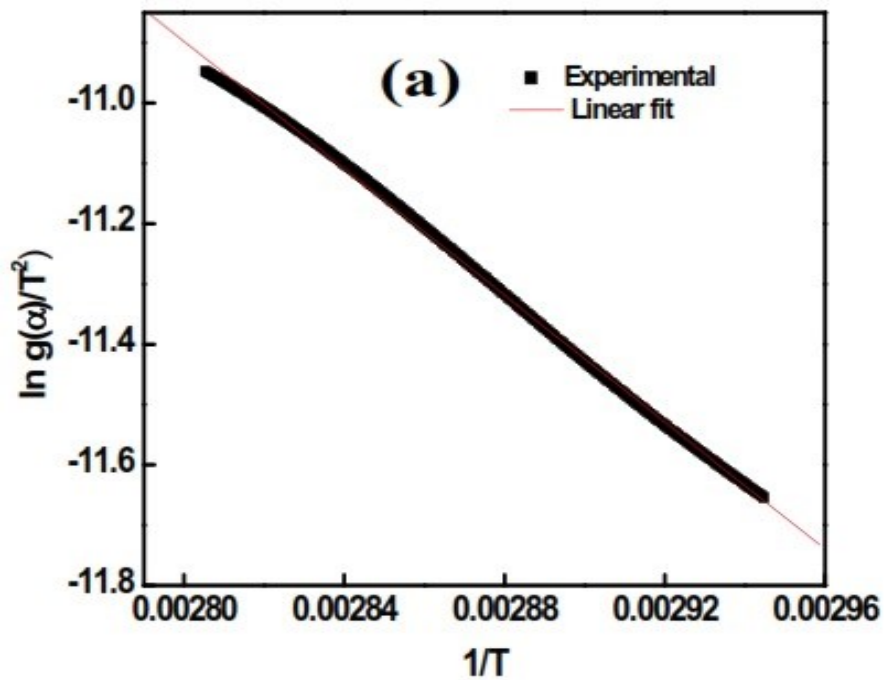

**Figure S2.** Linearization curves obtained by Coats-Redfern method for Ni-Mix sample.

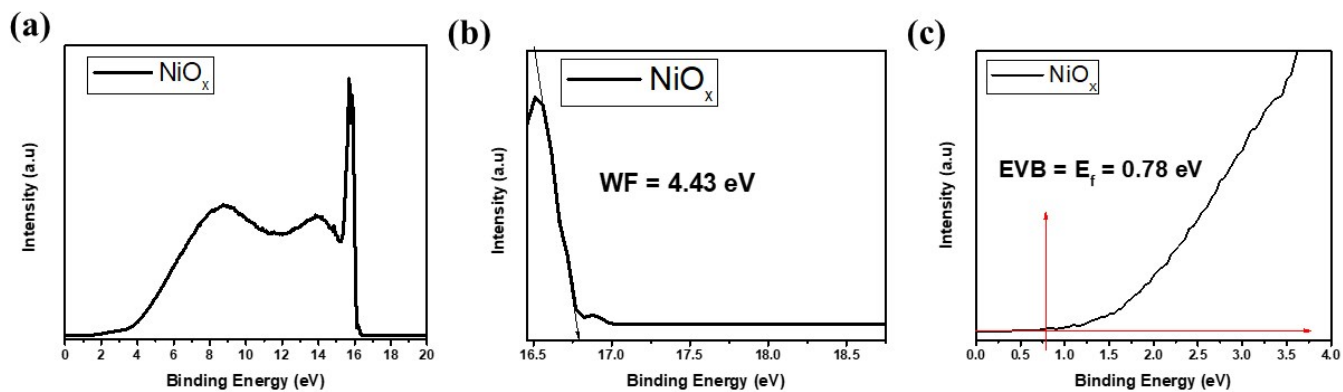

**Figure S3.** (a) UPS spectra of  $\text{NiO}_x$ . (b) and (c) The valence band maximum (VBM) and work function (WF) of  $\text{NiO}_x$  thin film.

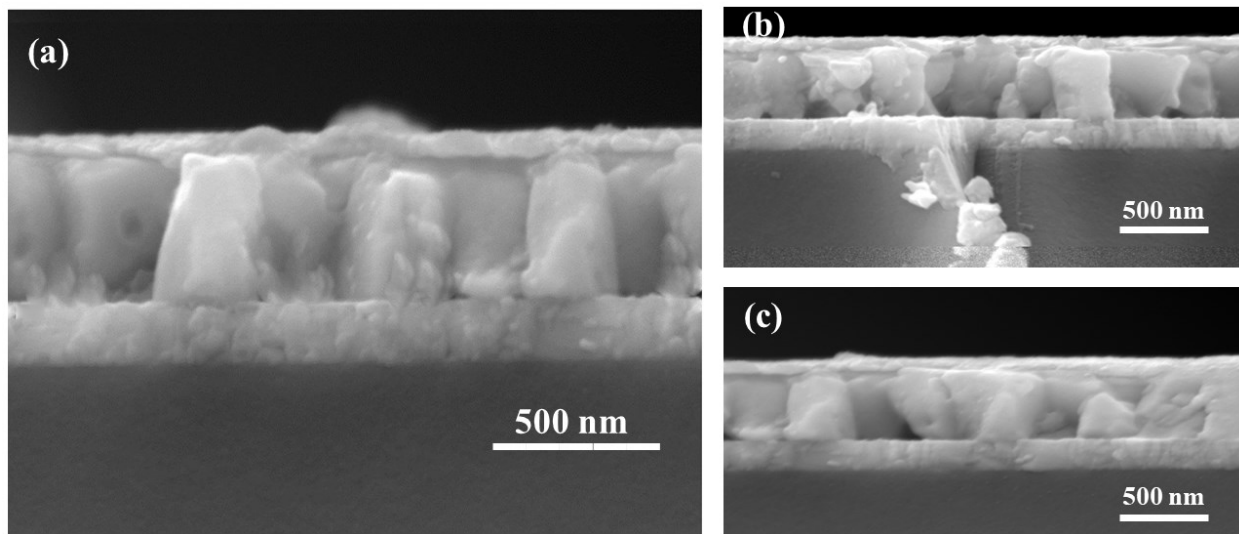

**Figure S4.** Cross-sectional image by scanning electron microscope for the optimized device based on (a)  $\text{Ni}_2\text{O}_3$ , (b)  $\text{NiO}_x$ , and (c) PEDOT:PSS as HTL with configuration FTO/HTL/ $\text{MA}_{0.85}\text{FA}_{0.15}\text{PbI}_{0.9}\text{Cl}_{0.1}$ /PCBM/BCP/Ag.

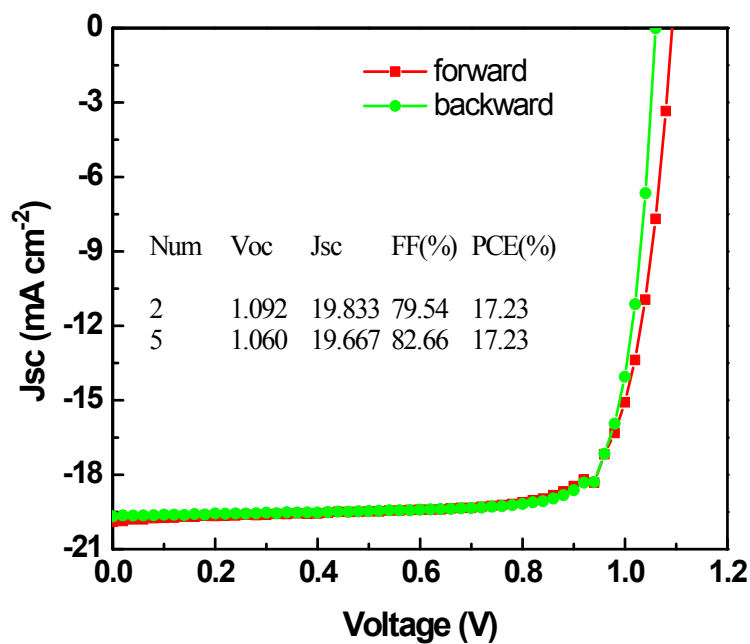

**Figure S5.** J–V curves of perovskite solar cells based on  $\text{Ni}_2\text{O}_3$  measured under different scan directions.

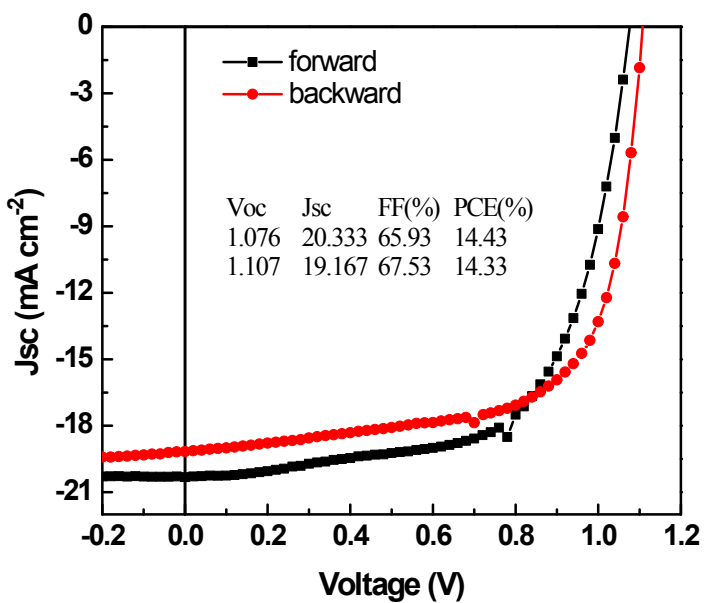

**Figure S6.** J–V curves of perovskite solar cells based on  $\text{NiO}_x$  measured under different scan directions.

**Table S1.** Kinetic data of the thermal decomposition of Ni-Ac, Ni-Nt, and Ni-Mix compounds by Coats-Redfern method.

| Compounds | Steps           | Cs   | $\infty$ | Coats - Redfern |                                        |                      |                                                      |                                      |                                      |
|-----------|-----------------|------|----------|-----------------|----------------------------------------|----------------------|------------------------------------------------------|--------------------------------------|--------------------------------------|
|           |                 |      |          | R <sup>2</sup>  | E <sub>a</sub><br>KJ mol <sup>-1</sup> | A<br>S <sup>-1</sup> | $\Delta S^*$<br>KJ mol <sup>-1</sup> K <sup>-1</sup> | $\Delta H^*$<br>KJ mol <sup>-1</sup> | $\Delta G^*$<br>KJ mol <sup>-1</sup> |
| Ni-Ac     | 1 <sup>st</sup> | 0.04 | 0.02     | 0.868           | 23.99                                  | 1.08x10 <sup>3</sup> | 180.4                                                | -26.85                               | 47.1                                 |
|           | 2 <sup>nd</sup> | 0.91 | 0.09     | 0.970           | 57.77                                  | 7.8x10 <sup>4</sup>  | 149.2                                                | -55.85                               | 98.1                                 |
| Ni-Nt     | 1 <sup>st</sup> | 0.26 | 0.017    | 0.992           | 64.9                                   | 2.5x10 <sup>8</sup>  | 79                                                   | -62.95                               | 74.02                                |
|           | 2 <sup>nd</sup> | 0.28 | 0.024    | 0.996           | 46.4                                   | 2.5x10 <sup>2</sup>  | 203.6                                                | -42.8                                | 146.75                               |
| Ni-Mix    | 1 <sup>st</sup> | 0.4  | 0.001    | 0.970           | 72.46                                  | 3.1x10 <sup>3</sup>  | 182                                                  | -68.9                                | 162.01                               |

## References

1. R. Ebrahimi-Kahrizsangi and M. H. Abbasi, *T. Nonferr. Metal. Soc.*, 2008, **18**, 217-221.
2. S. Sajid, A. M. Elseman, H. Huang, J. Ji, S. Dou, H. Jiang, X. Liu, D. Wei, P. Cui and M. Li, *Nano Energy*, 2018, **51**, 408-424.
